# Supplementary material for: NAD(P)H Drives the Ascorbate–Glutathione Cycle and Abundance of Catalase in Developing Beech Seeds Differently in Embryonic Axes and Cotyledons
Source: MDPI journal article supplement (doi:10.3390/antiox10122021), 2021-12-20
Supplement: s1 [file s1]

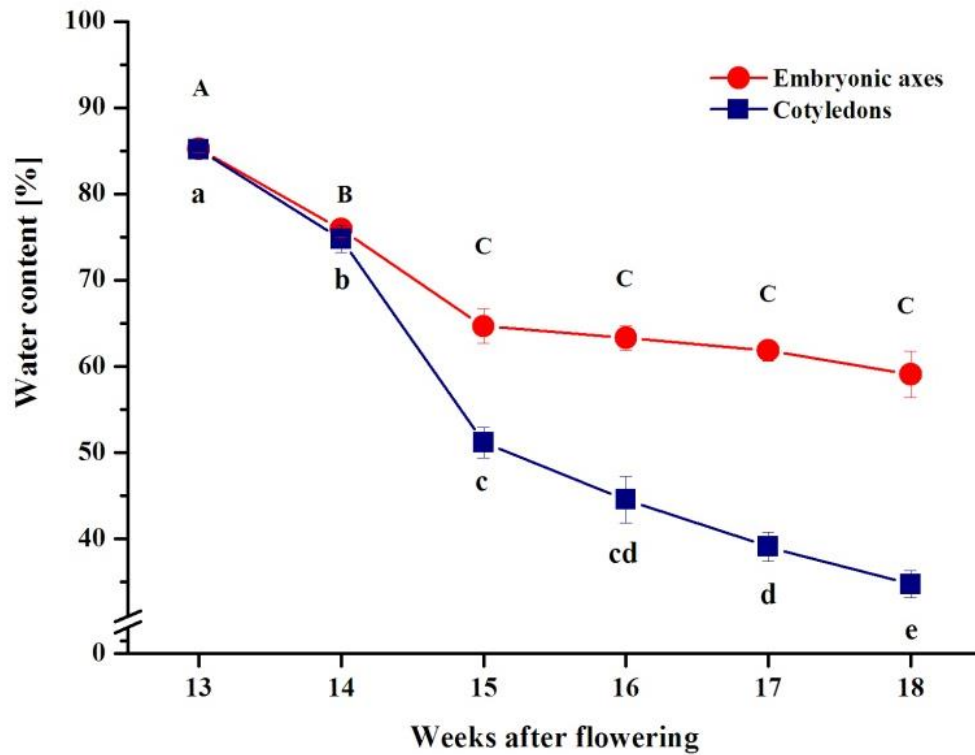

**Figure S1.** Water content in embryonic axes and cotyledons of developing beech seeds. Data are the means of three independent replicates  $\pm$  the standard error. Statistically significant differences are indicated with different letters (one-way ANOVA, followed by Tukey's test at  $p < 0.05$ ). The capital letters refer to embryonic axes.
