# Supplementary figures and images for: NAD(P)H Drives the Ascorbate–Glutathione Cycle and Abundance of Catalase in Developing Beech Seeds Differently in Embryonic Axes and Cotyledons
Source: MDPI journal article supplement (doi:10.3390/antiox10122021), 2021-12-20

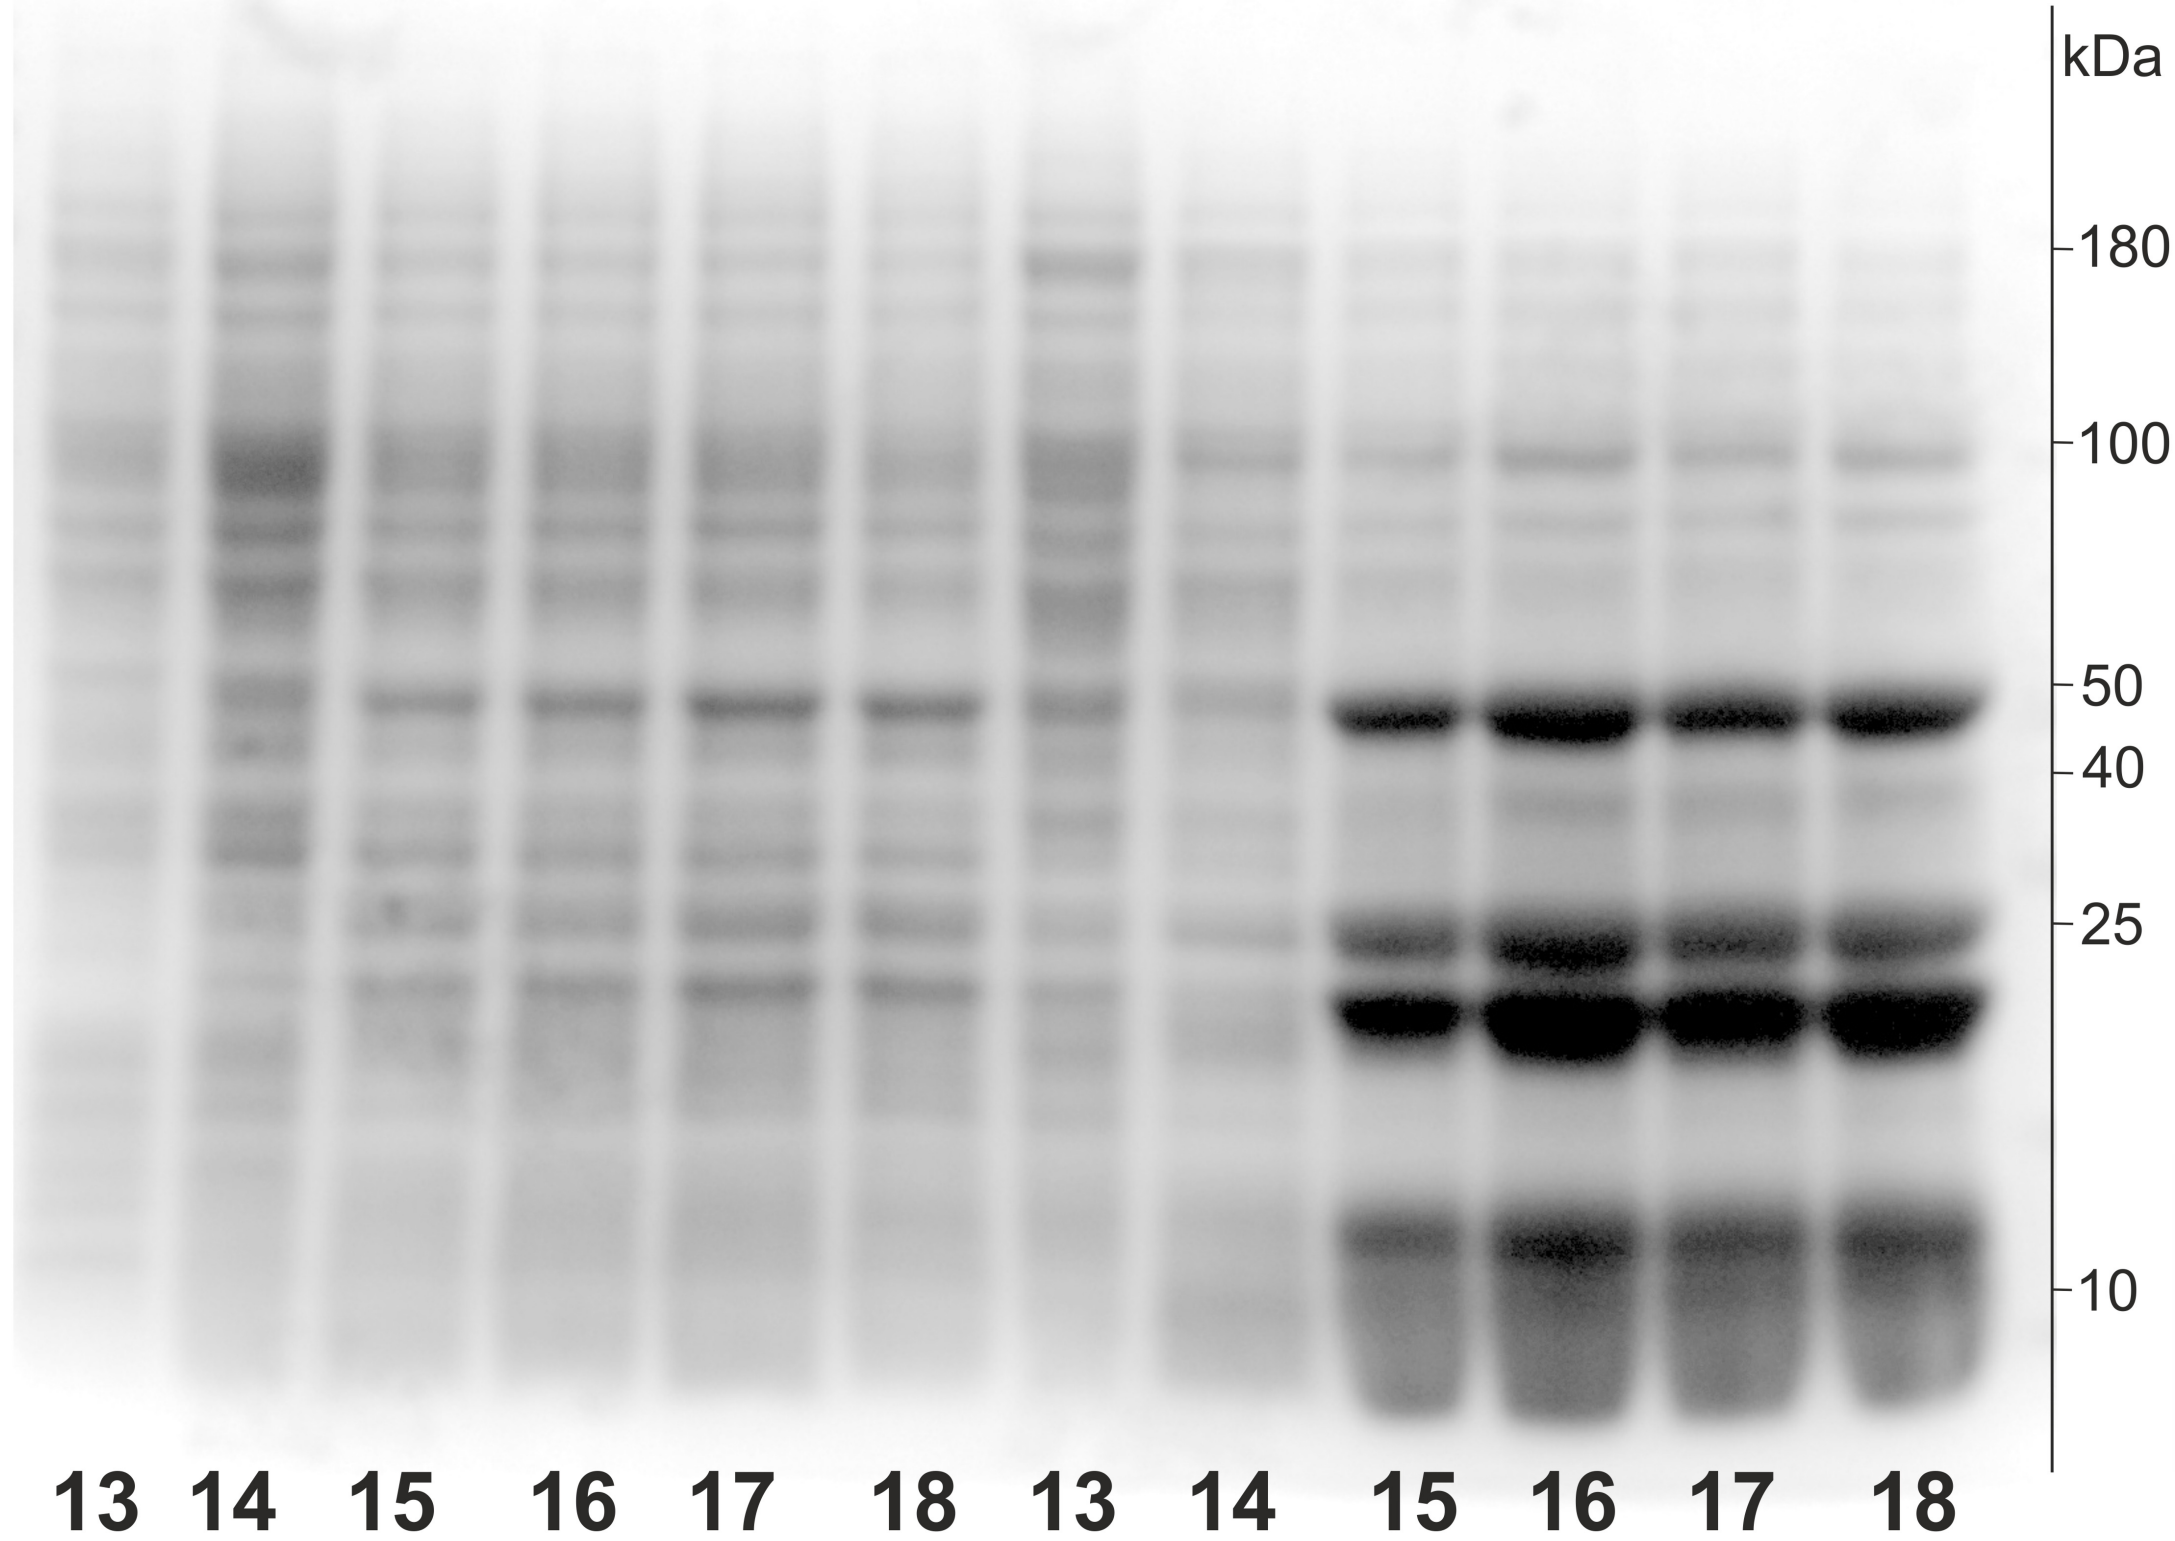

Supplement: s1 [file s1]
